# Supplementary material
Source: Springer Nature journal article supplement (https://www.springermedizin.de/resource/supplementary/12891_2014_2170_MOESM4_ESM.pdf/9509558)

# JAG INFORMATION TECHNOLOGY CENTRE

Officially opened by The Premier of the Western Cape, Education Minister and the Founder of the JAG Sports and Education Foundation, Sirag Jansen  
on 25 August 2007

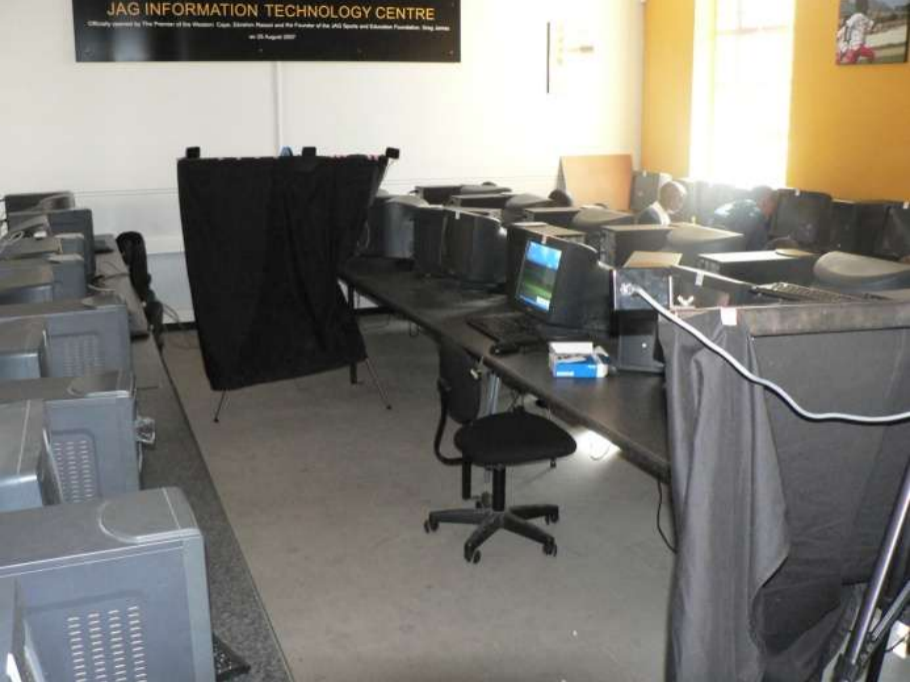

Supplement: MOESM4 [file 9509558]
